# Supplementary material for: A Deep Learning-Based Quantitative Structure–Activity Relationship System Construct Prediction Model of Agonist and Antagonist with High Performance
Source: MDPI journal article supplement (doi:10.3390/ijms23042141), 2022-02-15
Supplement: s1 [file s1]

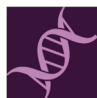

Figure S1

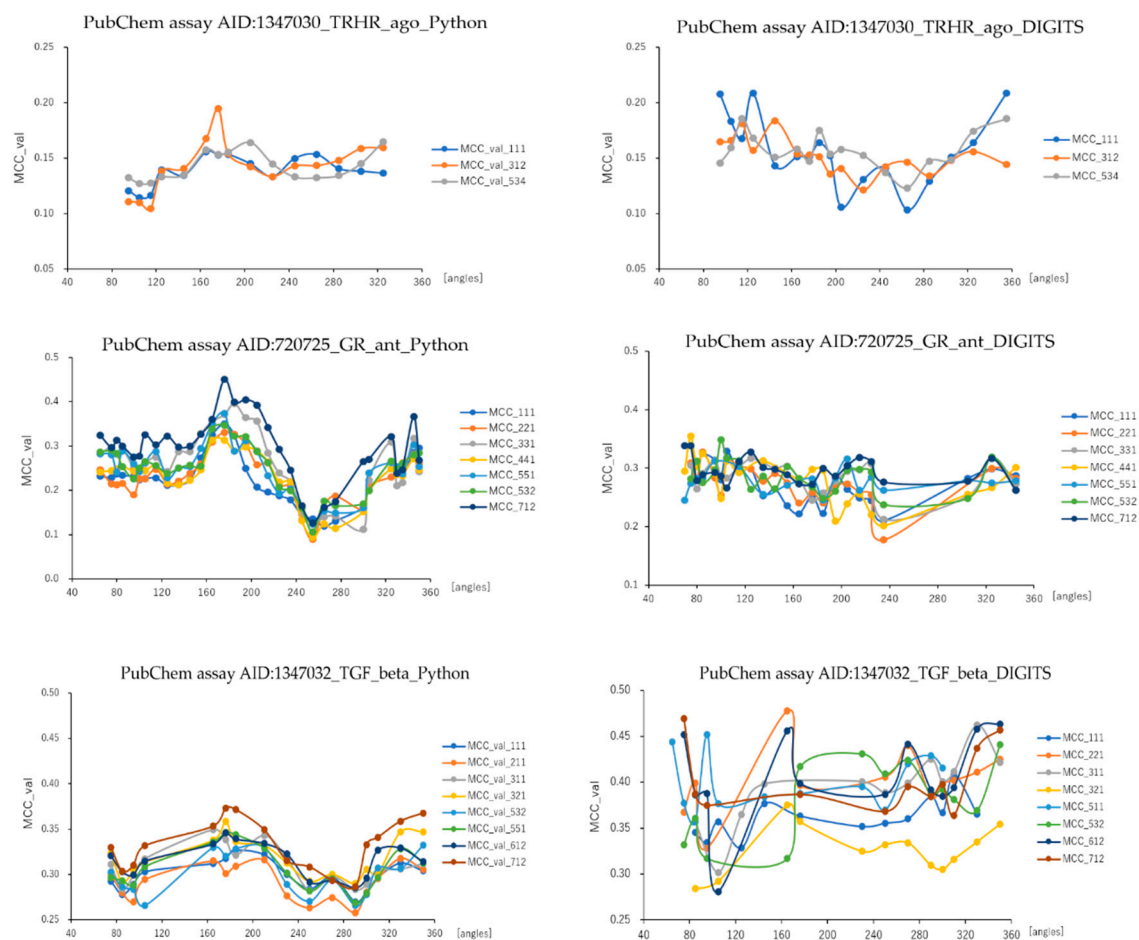

**Figure S1.** MCC with angles in DeepSnap-DL using TensorFlow and DIGITS of prediction models of the glucocorticoid receptor (PubChem assay AID:720725\_GR\_ant), TGF-beta/Smad (PubChem assay AID:1347032\_TGF\_beta\_ant), and agonist of the thyrotropin-releasing hormone receptor (PubChem assay AID:1347030\_TRHR\_ago) in the validation dataset;  $n = 3$ .

Figure S2

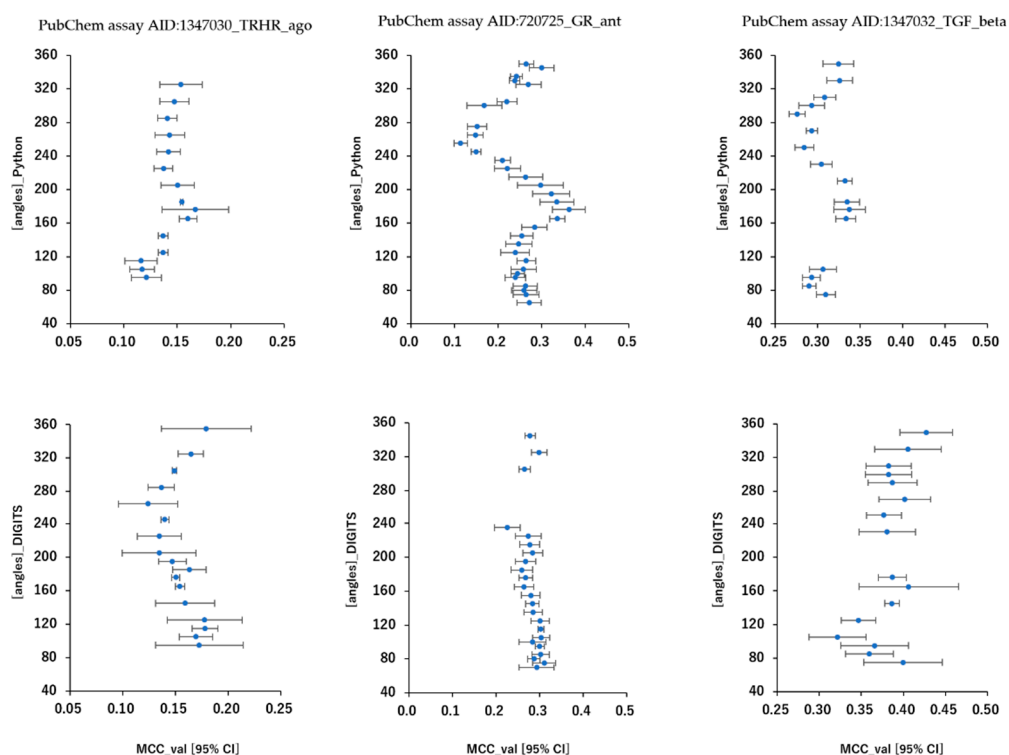

**Figure S2.** Differences in mean MCC levels shown as dots with 95% confident interval (95% CI) as error bars with angles in DeepSnap-DL using TensorFlow and DIGITS of prediction models of the glucocorticoid receptor (PubChem assay AID:720725\_GR\_ant), TGF-beta/Smad (PubChem assay AID:1347032\_TGF\_beta\_ant), and agonist of the thyrotropin-releasing hormone receptor (PubChem assay AID:1347030\_TRHR\_ago) in the validation dataset; n = 3.

Figure S3

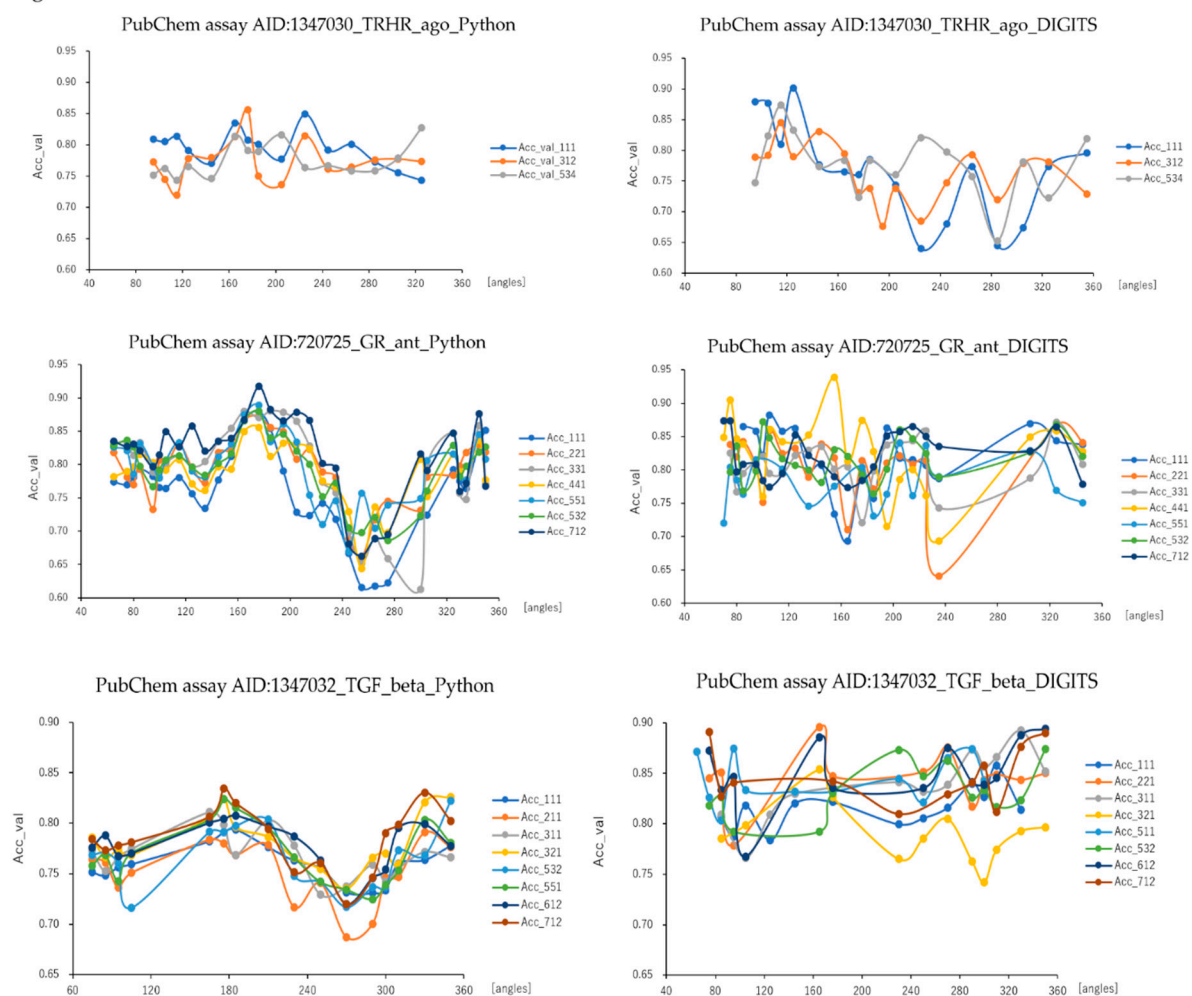

**Figure S3.** Acc with angles in DeepSnap-DL using TensorFlow and DIGITS of prediction models of the glucocorticoid receptor (PubChem assay AID:720725\_GR\_ant), TGF-beta/Smad (PubChem assay AID:1347032\_TGF\_beta\_ant), and agonist of the thyrotropin-releasing hormone receptor (PubChem assay AID:1347030\_TRHR\_ago) in the validation dataset; n=3.

Figure S4

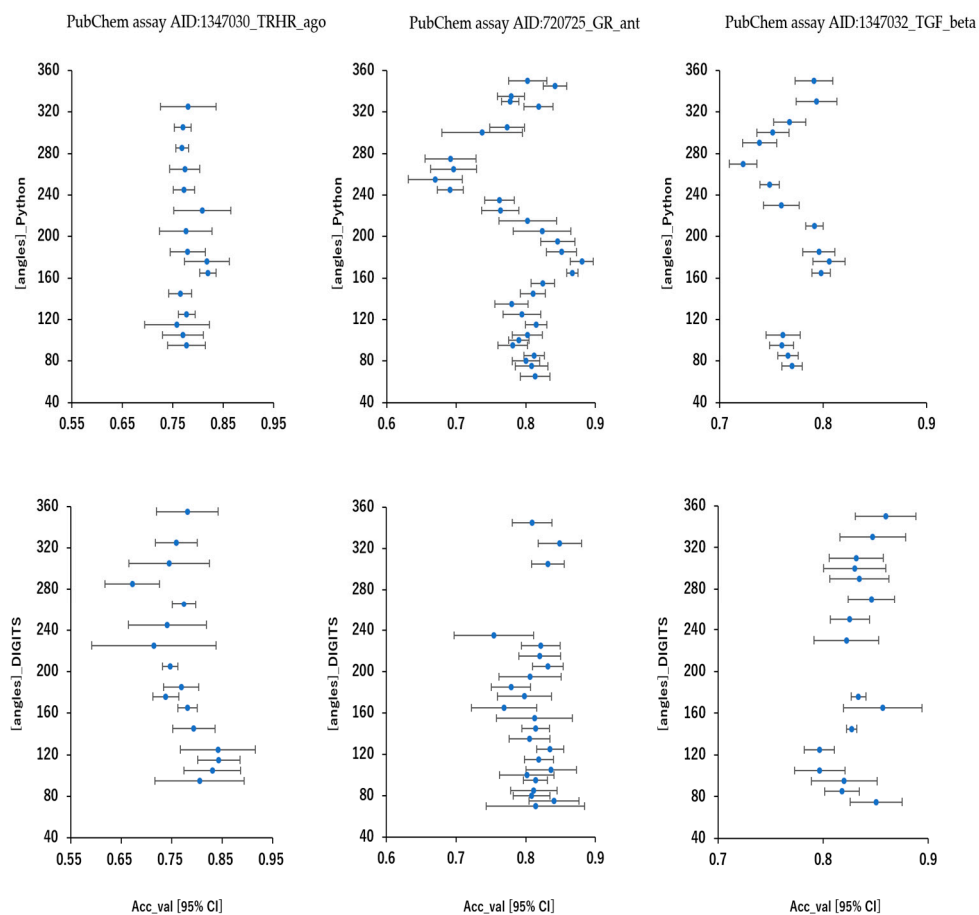

**Figure S4.** Differences in mean Acc levels shown as dots with 95% confident interval (95% CI) as error bars with angles in DeepSnap-DL using TensorFlow and DIGITS of prediction models of the glucocorticoid receptor (PubChem assay AID:720725\_GR\_ant), TGF-beta/Smad (PubChem assay AID:1347032\_TGF\_beta\_ant), and agonist of the thyrotropin-releasing hormone receptor (PubChem assay AID:1347030\_TRHR\_ago) in the validation dataset; n = 3.

Figure S5

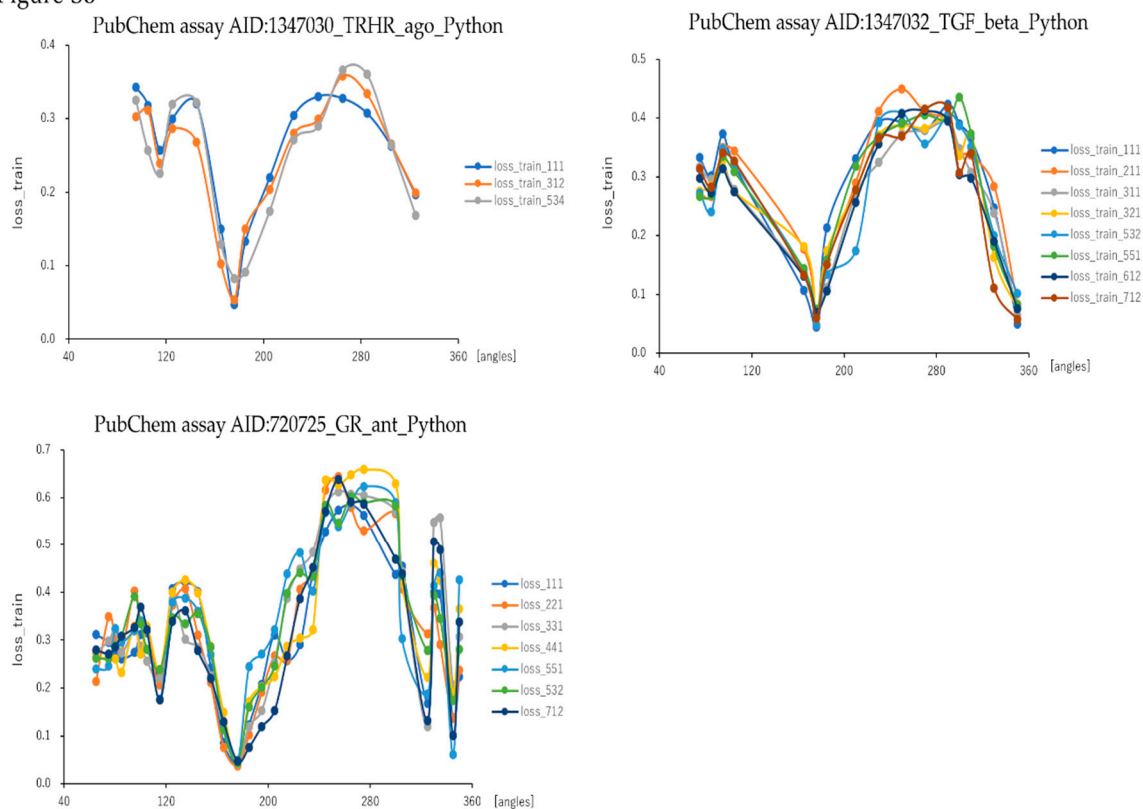

**Figure S5.** Loss with angles in DeepSnap-DL using TensorFlow and DIGITS of prediction models of the glucocorticoid receptor (PubChem assay AID:720725\_GR\_ant), TGF-beta/Smad (PubChem assay AID:1347032\_TGF\_beta\_ant), and agonist of the thyrotropin-releasing hormone receptor (PubChem assay AID:1347030\_TRHR\_ago) in the training dataset; n = 3.

Figure S6

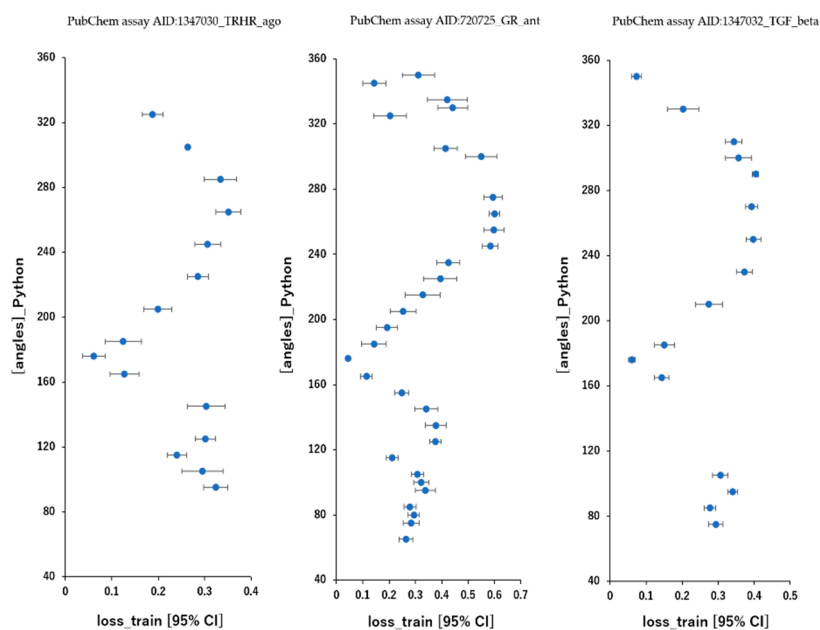

**Figure S6.** Differences in mean loss levels shown as dots with 95% confident interval (95% CI) as error bars with angles in DeepSnap-DL using TensorFlow and DIGITS of prediction models of the glucocorticoid receptor (PubChem assay AID:720725\_GR\_ant), TGF-beta/Smad (PubChem assay AID:1347032\_TGF\_beta\_ant), and agonist of the thyrotropin-releasing hormone receptor (PubChem assay AID:1347030\_TRHR\_ago) in the training dataset;  $n = 3$ .

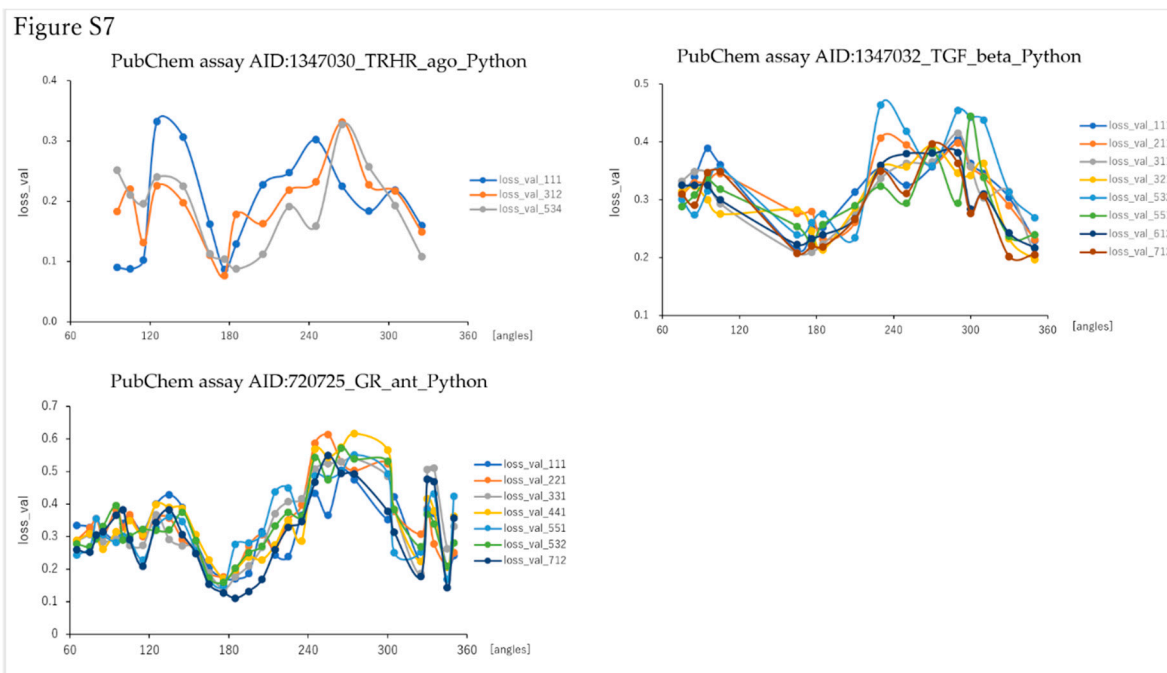

**Figure S7.** Loss with angles in DeepSnap-DL using TensorFlow and DIGITS of prediction models of the glucocorticoid receptor (PubChem assay AID:720725\_GR\_ant), TGF-beta/Smad (PubChem assay AID:1347032\_TGF\_beta\_ant), and agonist of the thyrotropin-releasing hormone receptor (PubChem assay AID:1347030\_TRHR\_ago) in the validation dataset; n = 3.

Figure S8

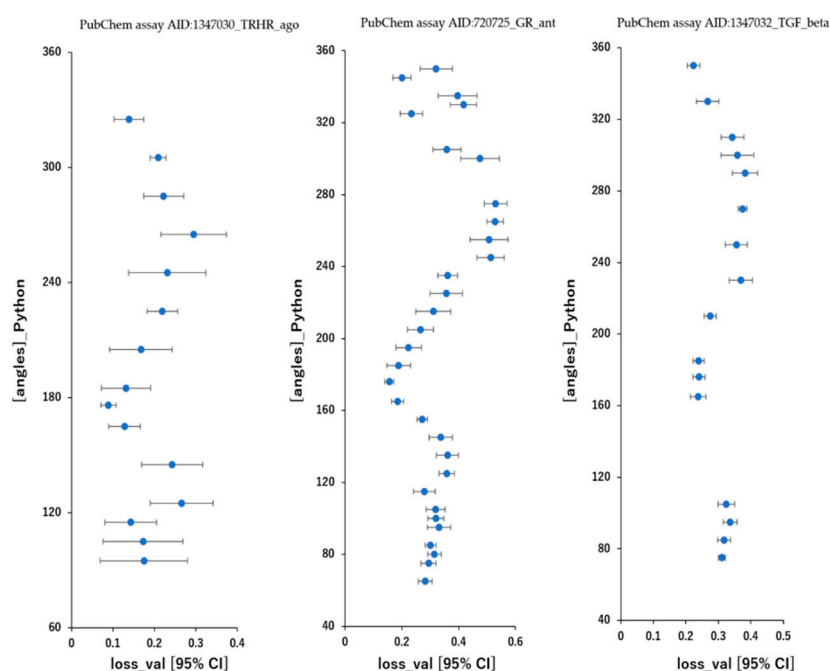

**Figure S8.** Differences in mean loss levels shown as dots with 95% confident interval (95% CI) as error bars with angles in DeepSnap-DL using TensorFlow and DIGITS of prediction models of the glucocorticoid receptor (PubChem assay AID:720725\_GR\_ant), TGF-beta/Smad (PubChem assay AID:1347032\_TGF\_beta\_ant), and agonist of the thyrotropin-releasing hormone receptor (PubChem assay AID:1347030\_TRHR\_ago) in the validation dataset; n = 3.

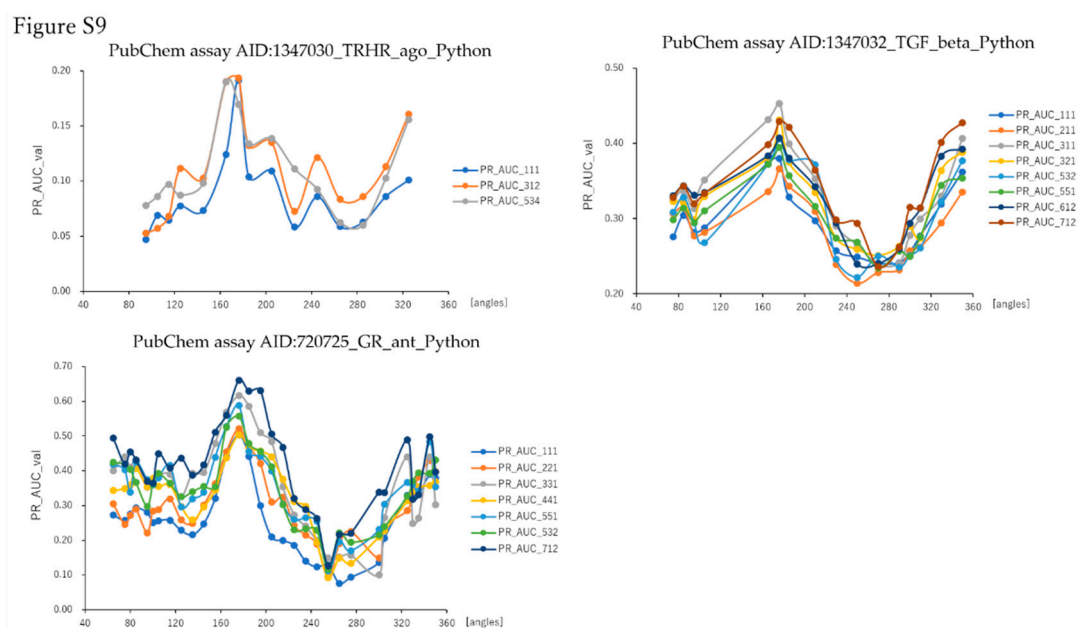

**Figure S9.** PR\_AUC with angles in DeepSnap-DL using TensorFlow and DIGITS of prediction models of the glucocorticoid receptor (PubChem assay AID:720725\_GR\_ant), TGF-beta/Smad (PubChem assay AID:1347032\_TGF\_beta\_ant), and agonist of the thyrotropin-releasing hormone receptor (PubChem assay AID:1347030\_TRHR\_ago) in the validation dataset;  $n = 3$ .

Figure S10

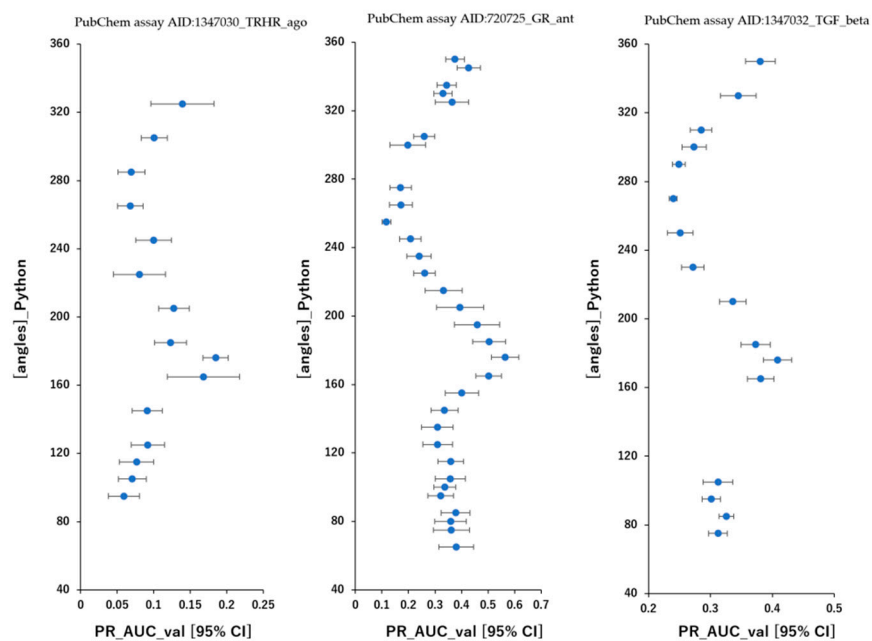

**Figure S10.** Differences in mean PR\_AUC levels shown as dots with 95% confident interval (95% CI) as error bars with angles in DeepSnap-DL using TensorFlow and DIGITS of prediction models of the glucocorticoid receptor (PubChem assay AID:720725\_GR\_ant), TGF-beta/Smad (PubChem assay AID:1347032\_TGF\_beta\_ant), and agonist of the thyrotropin-releasing hormone receptor (PubChem assay AID:1347030\_TRHR\_ago) in the validation dataset; n = 3.

Figure S11

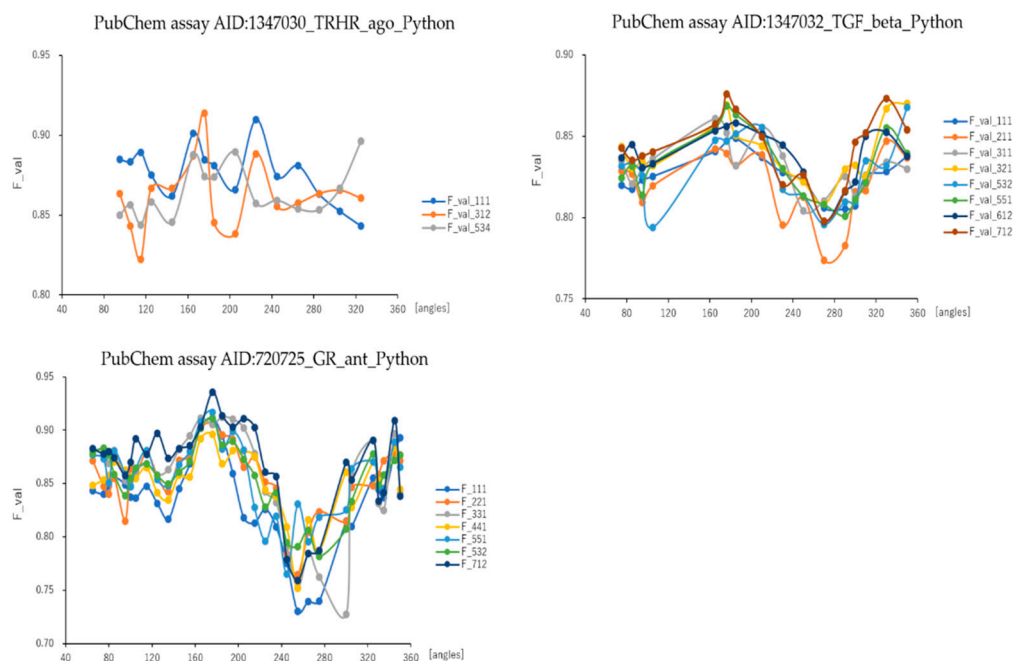

**Figure S11.** F with angles in DeepSnap-DL using TensorFlow and DIGITS of prediction models of the glucocorticoid receptor (PubChem assay AID:720725\_GR\_ant), TGF-beta/Smad (PubChem assay AID:1347032\_TGF\_beta\_ant), and agonist of the thyrotropin-releasing hormone receptor (PubChem assay AID:1347030\_TRHR\_ago) in the validation dataset; n = 3.

Figure S12

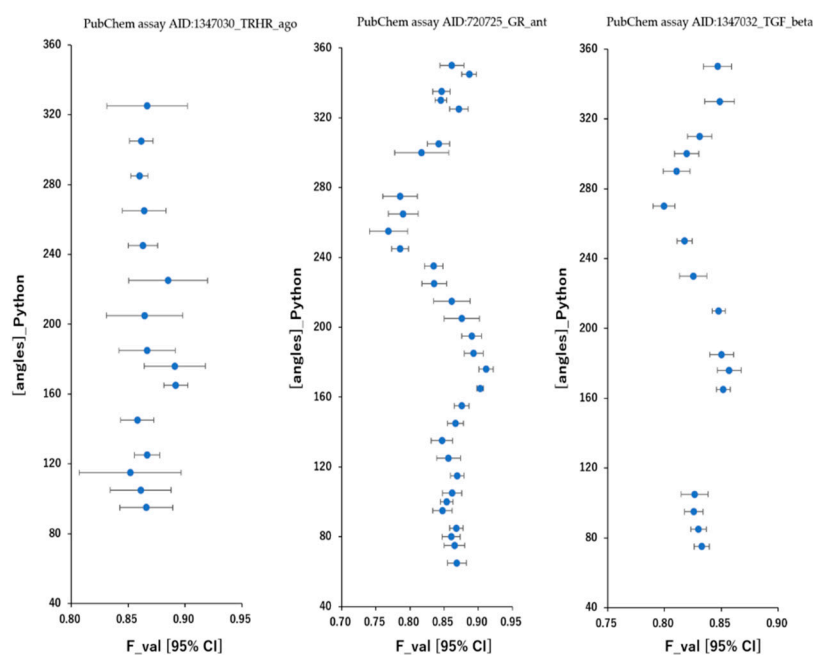

**Figure S12.** Differences in mean F levels shown as dots with 95% confident interval (95% CI) as error bars with angles in DeepSnap-DL using TensorFlow and DIGITS of prediction models of the glucocorticoid receptor (PubChem assay AID:720725\_GR\_ant), TGF-beta/Smad (PubChem assay AID:1347032\_TGF\_beta\_ant), and agonist of the thyrotropin-releasing hormone receptor (PubChem assay AID:1347030\_TRHR\_ago) in the validation dataset; n = 3.

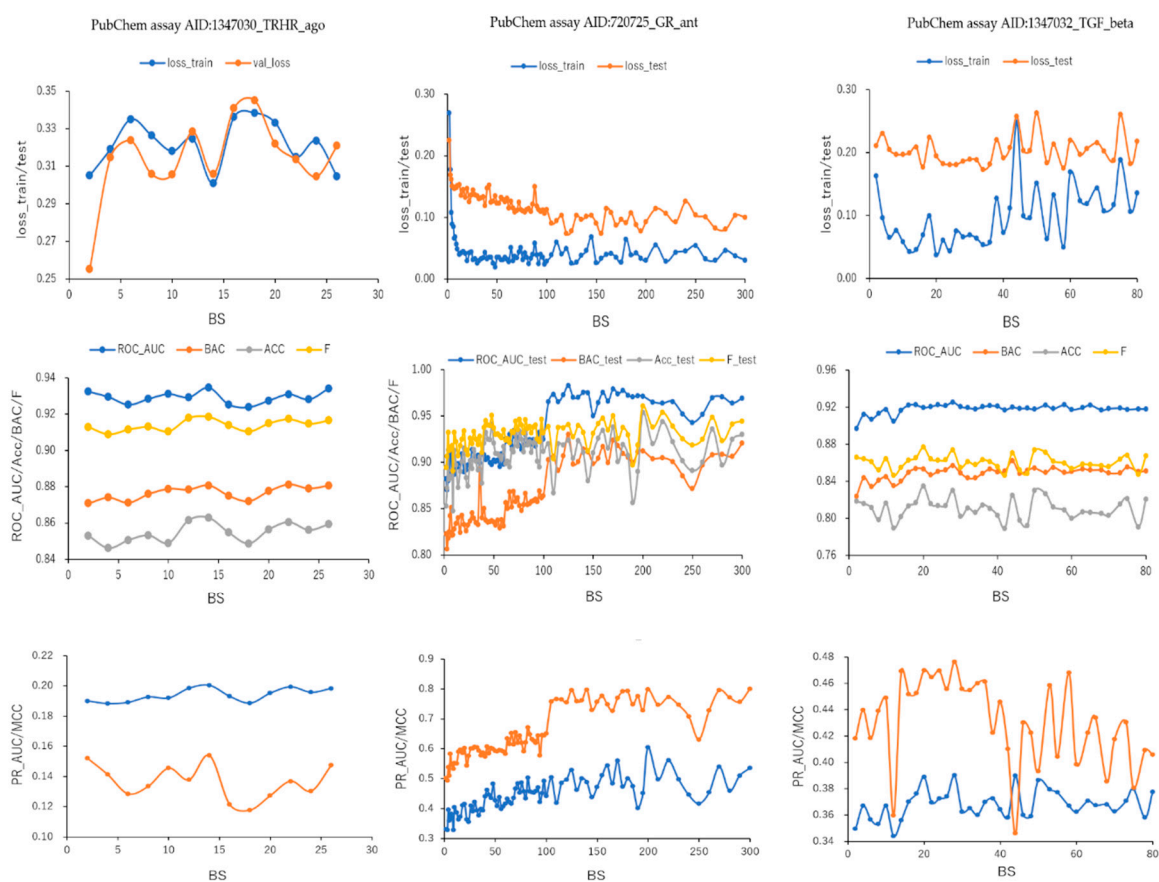

**Figure S13.** Performance with batch size (BSs) in DeepSnap-DL using TensorFlow of prediction models of the glucocorticoid receptor (PubChem assay AID:720725\_GR\_ant), TGF-beta/Smad (PubChem assay AID:1347032\_TGF\_beta\_ant), and agonist of the thyrotropin-releasing hormone receptor (PubChem assay AID:1347030\_TRHR\_ago) in the test dataset;  $n = 2$ .
